# Supplementary material
Source: MDPI journal article supplement (https://www.mdpi.com/search?q=marinedrugs-17-00336)
Supplement: s001 [file marinedrugs-17-00336-s001.pdf]

**Reducing effect of farnesylquinone on lipid mass in *C. elegans* by  
modulating lipid metabolism**

**Supporting Information**

Figure S1.  $^1\text{H}$  NMR spectrum of 1 in  $\text{CDCl}_3$

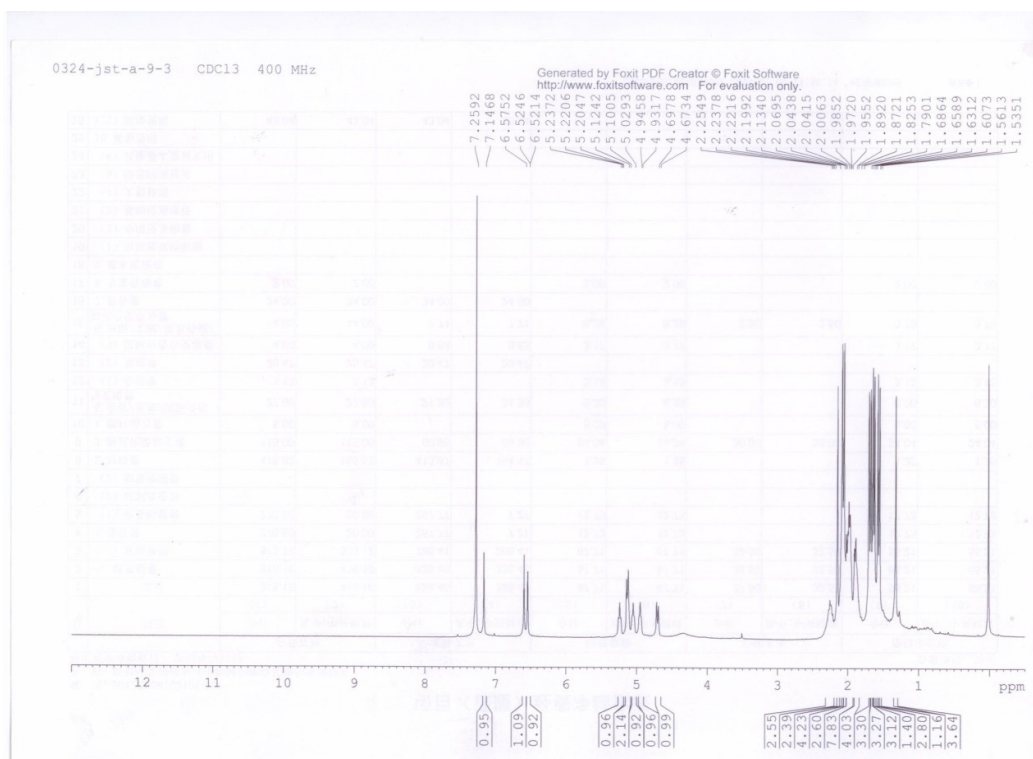

Figure S2.  $^{13}\text{C}$  NMR (DEPT) spectrum of 1 in  $\text{CDCl}_3$

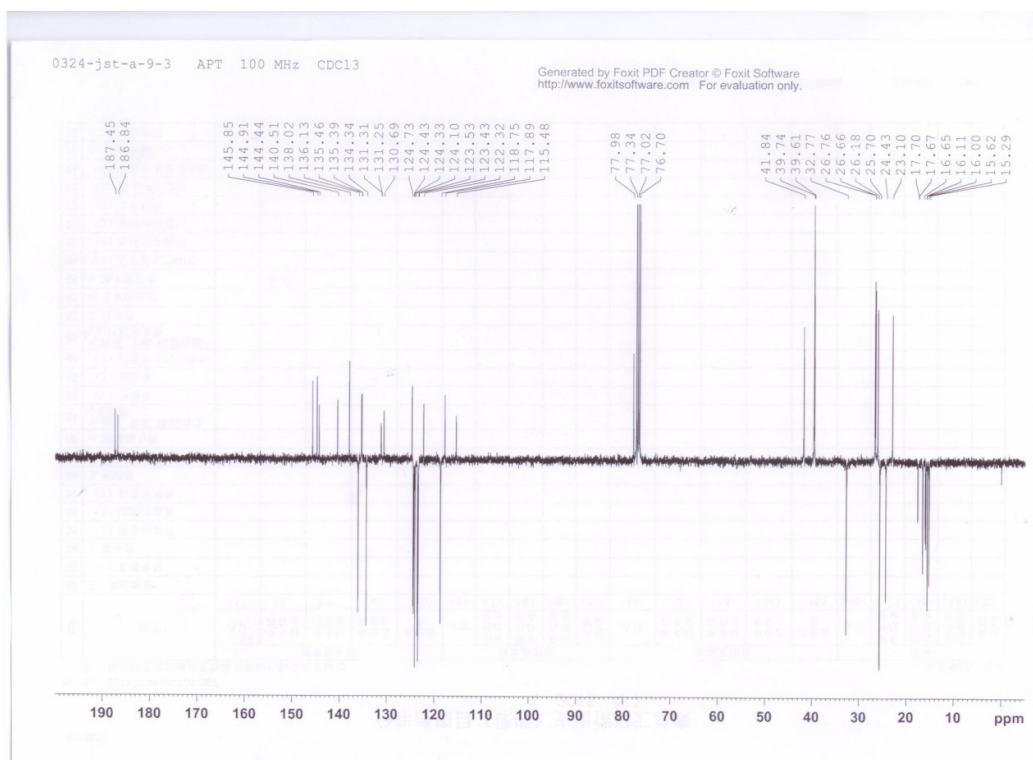

Figure S3. COSY spectrum of 1 in CDCl<sub>3</sub>

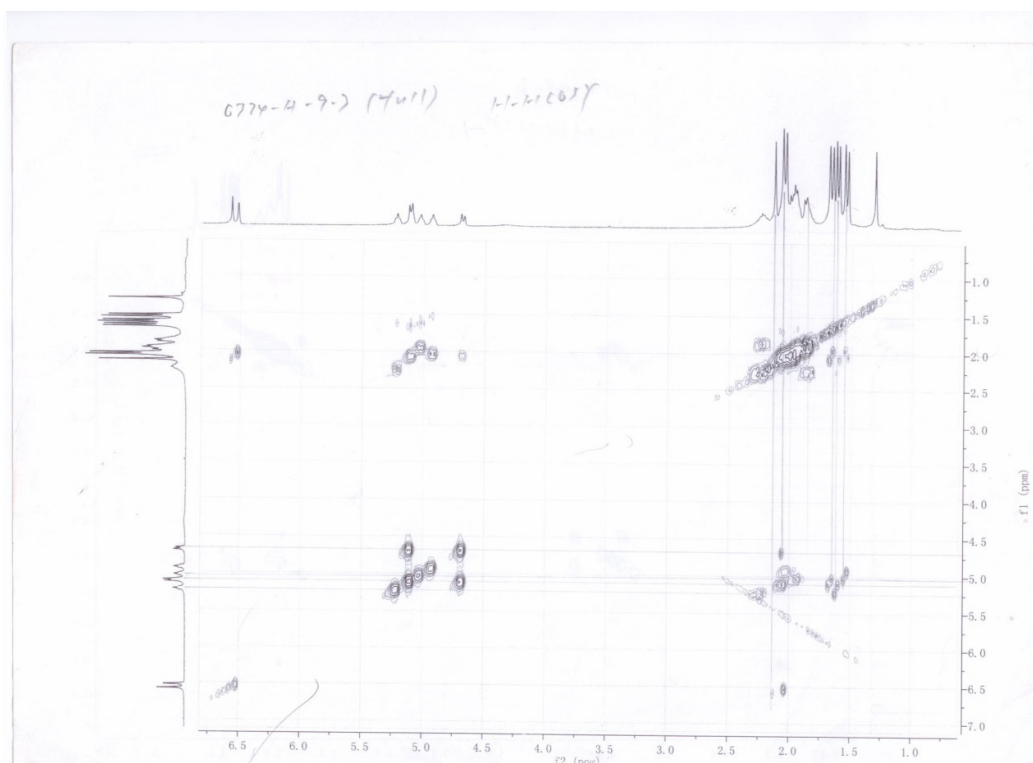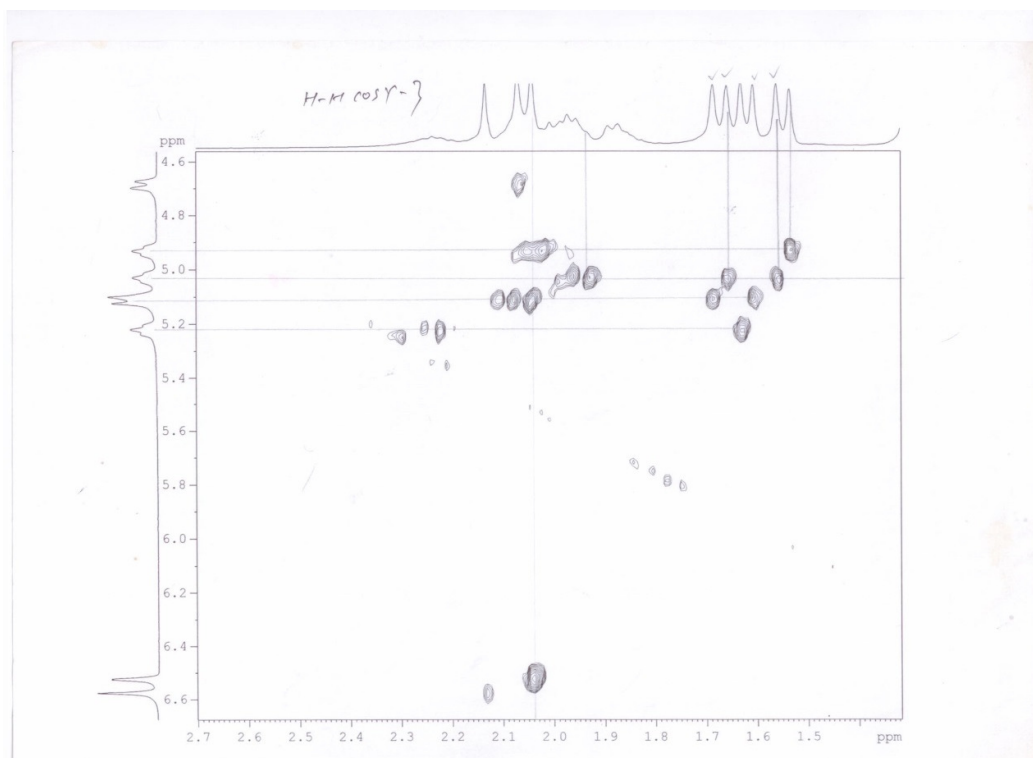

Figure S4. HSQC spectrum of 1 in CDCl<sub>3</sub>

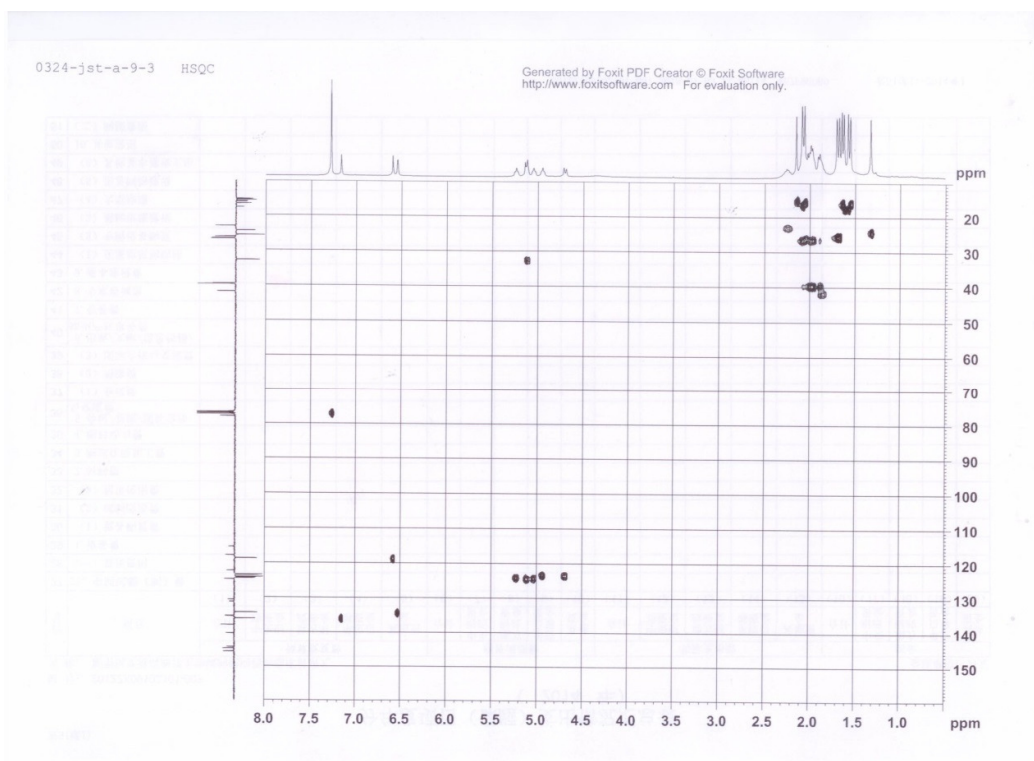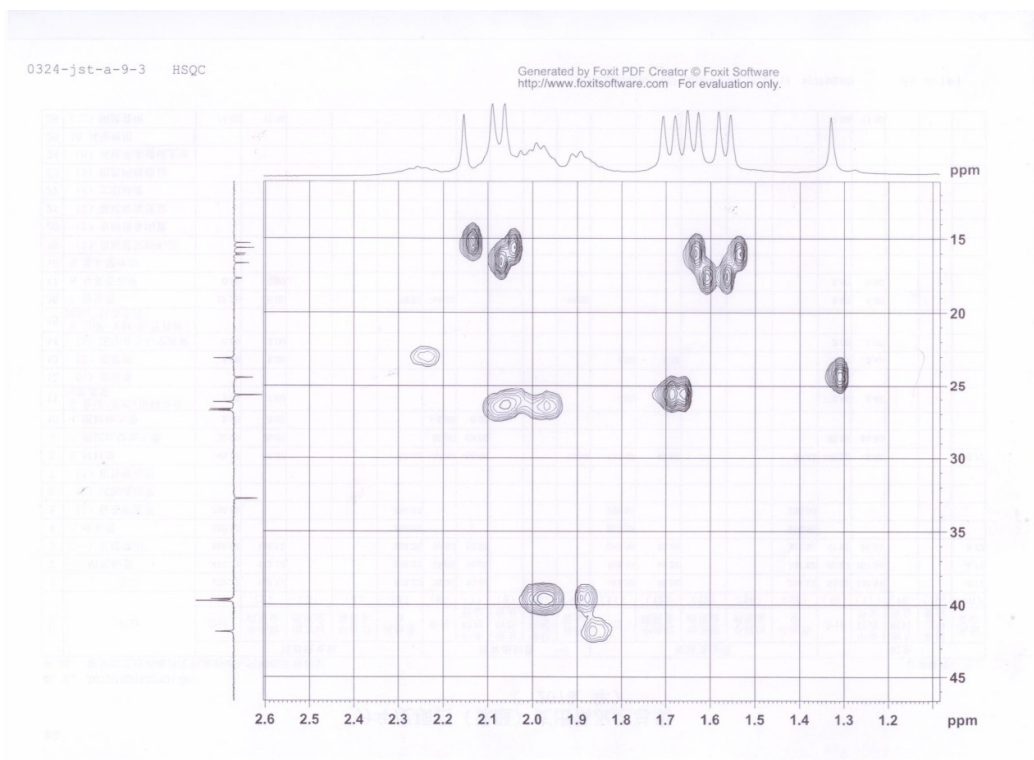

Figure S5. HMBC spectrum of 1 in CDCl<sub>3</sub>

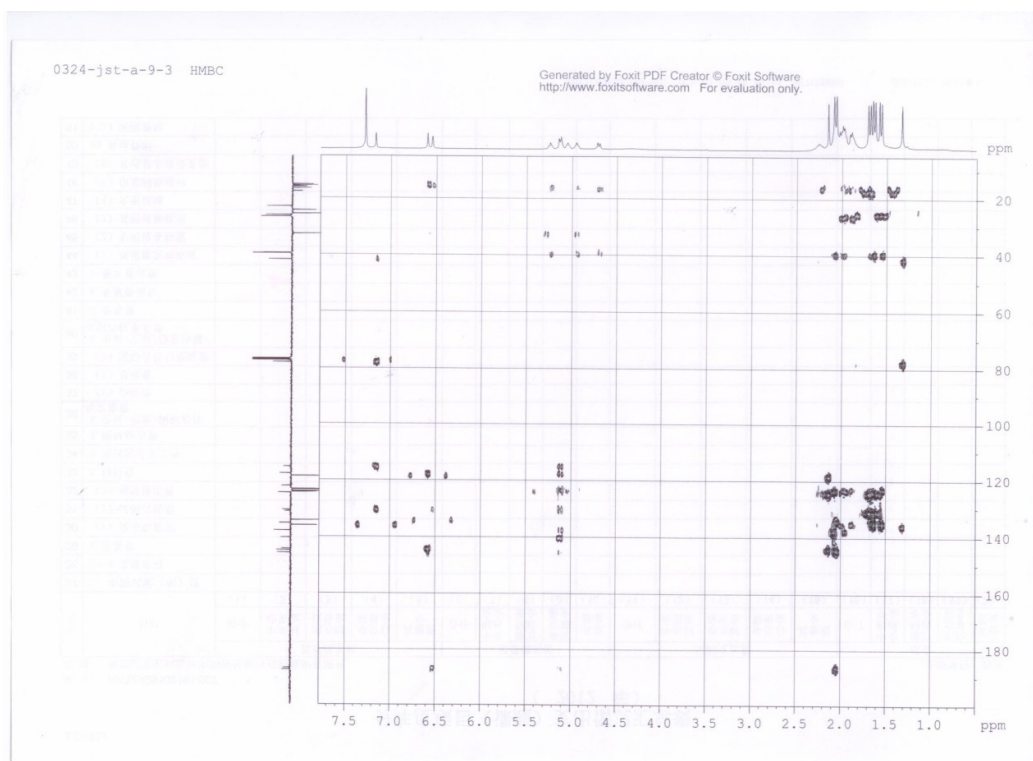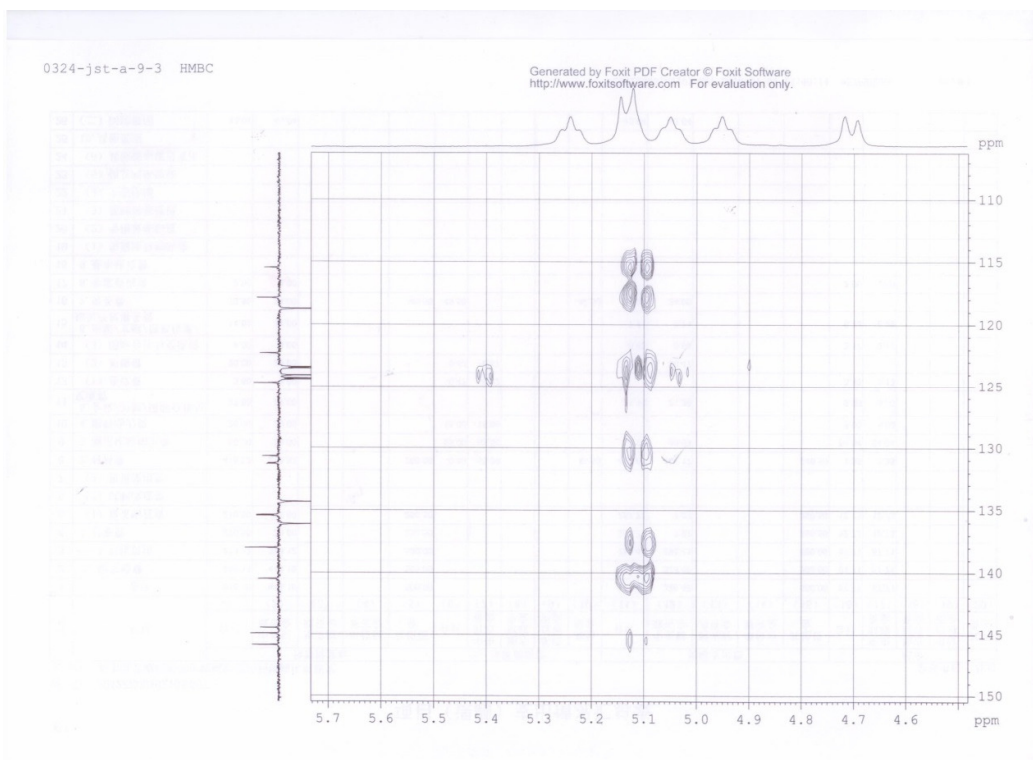



Figure S6. NOESY spectrum of 1 in CDCl<sub>3</sub>

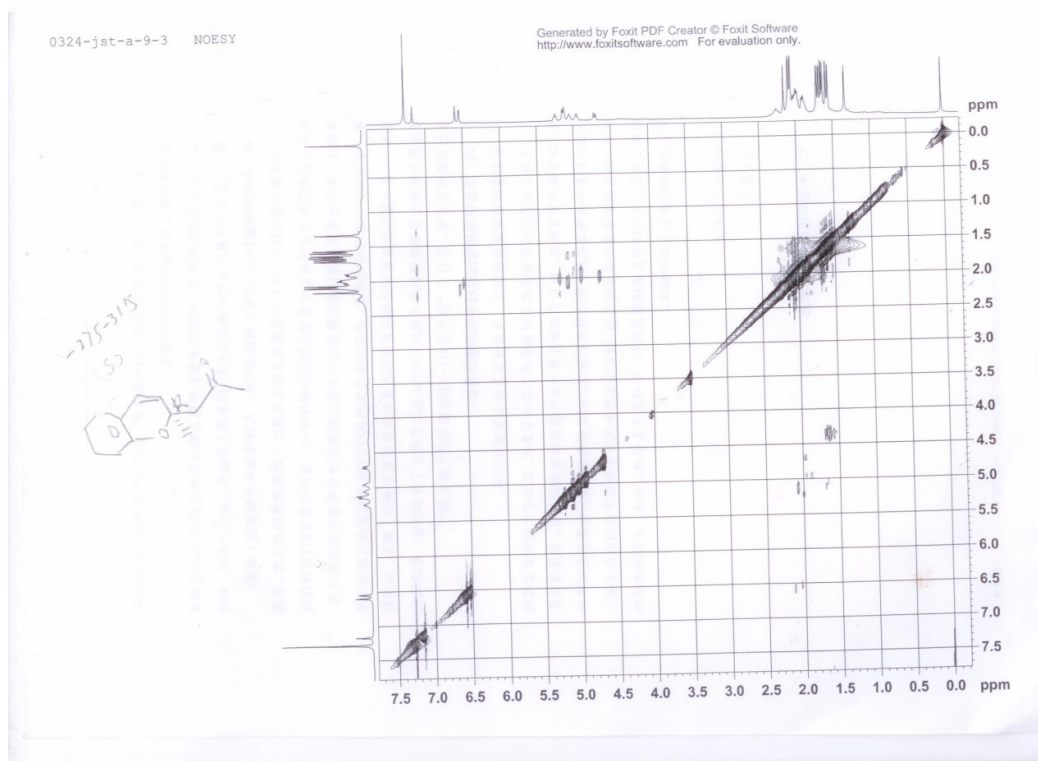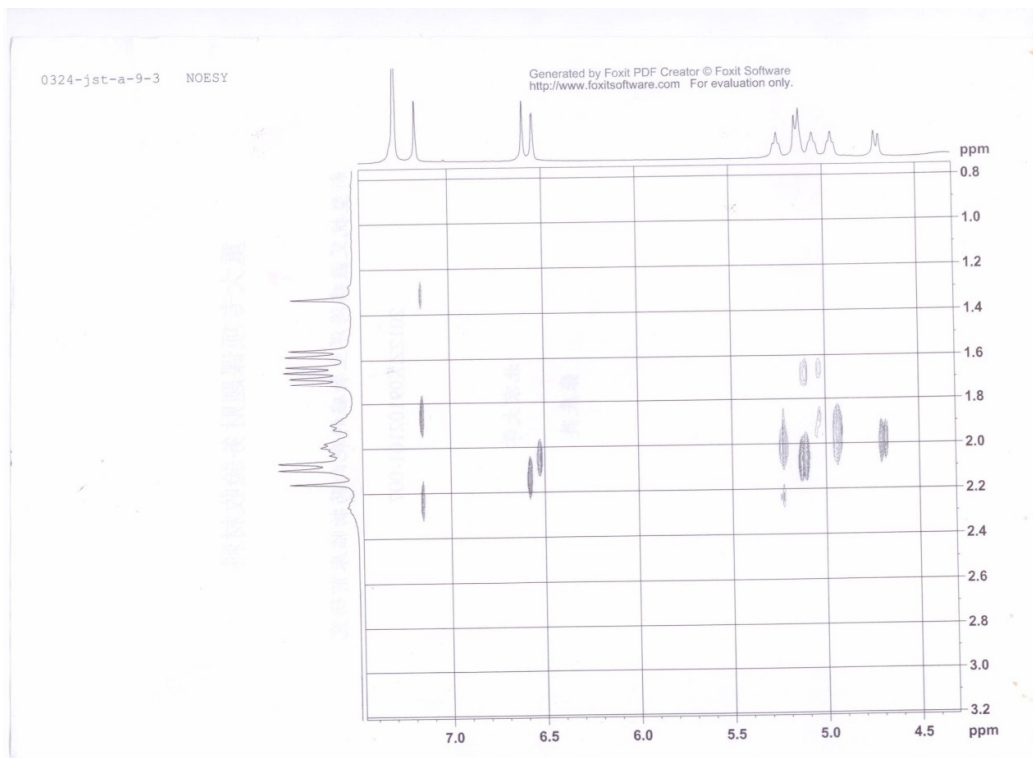

Figure S7. IR spectrum of 1

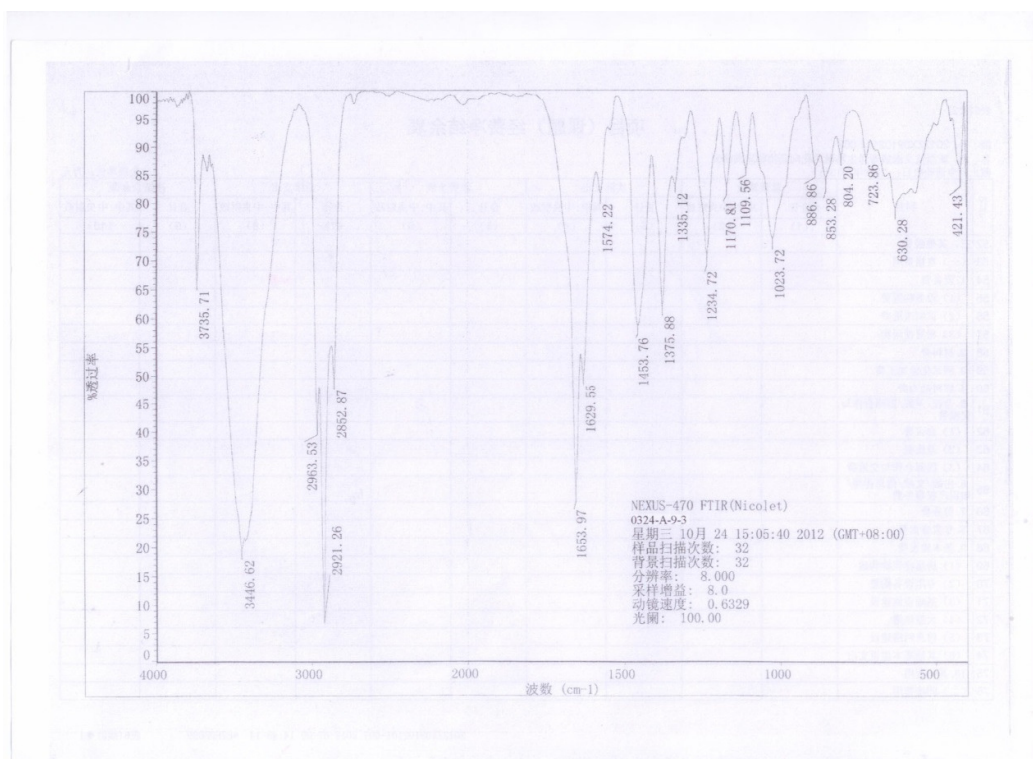

Figure S8. HRESIMS spectrum of 1

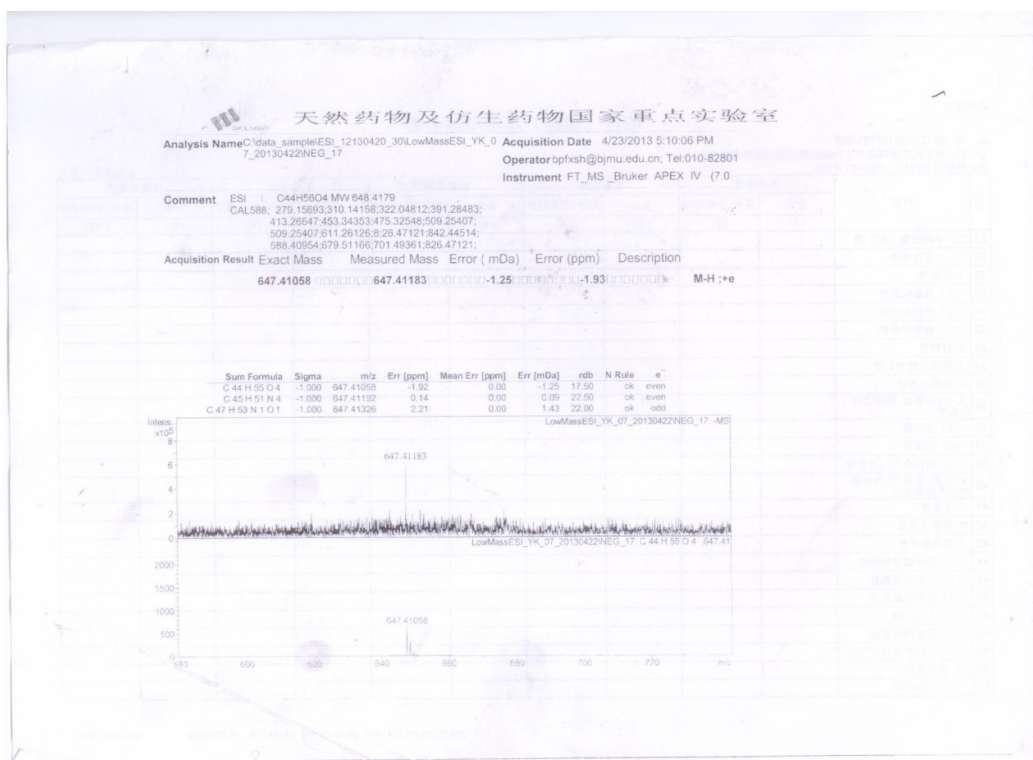

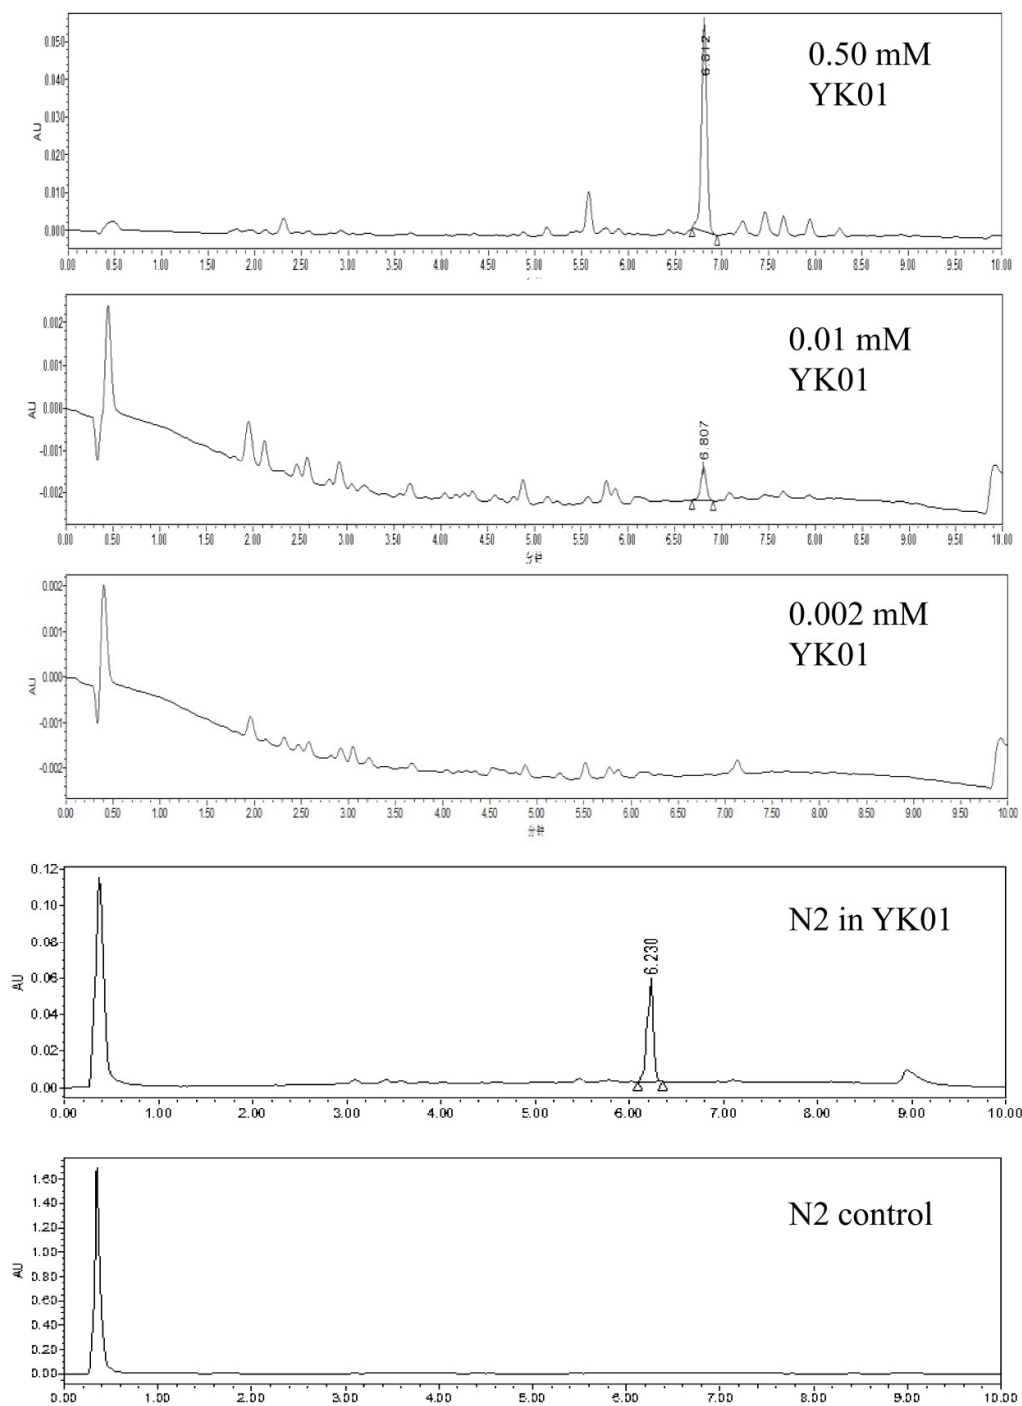

Figure S9. Measurement of the amount of ingested **2** in animals by UPLC. A. Chromatograms of YBH10-5 standards of 0.5 mM, 0.01mM and 0.002 mM concentration respectively, 0.002 mM was out the detection limit. B.  $2 \times 10^5$  L4 N2 worms were put into 0.5 mM of **2** solution, methanol extract was for UPLC analysis (Upper panel); Drug soaked animals (lower panel).

**Compound 2 = YK01**
